# Supplementary material for: Chitosan-Coated Alginate Microcapsules of a Full-Spectrum Cannabis Extract: Characterization, Long-Term Stability and In Vitro Bioaccessibility
Source: MDPI journal article supplement (doi:10.3390/pharmaceutics15030859), 2023-03-07
Supplement: s1 [file s1]

**Table S1.** Chemical structure, name, molecular formula, average mass and log P of the most relevant cannabinoids.

| Chemical Structure                                                                 | R    | Name<br>(Abbreviation)                               | Molecular formula<br>Average mass (Da)<br>Log P |
|------------------------------------------------------------------------------------|------|------------------------------------------------------|-------------------------------------------------|
| 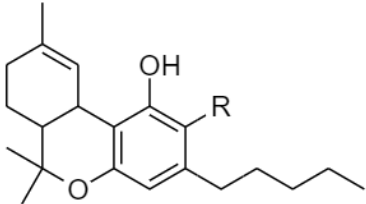   | H    | $\Delta^9$ -tetrahydrocannabinol<br>(THC)            | $C_{21}H_{30}O_2$<br>314.462<br>7.68            |
|                                                                                    | COOH | $\Delta^9$ -tetrahydrocannabinolic<br>acid<br>(THCA) | $C_{22}H_{30}O_4$<br>358.471<br>8.41            |
|    | H    | Cannabidiol<br>(CBD)                                 | $C_{21}H_{30}O_2$<br>314.462<br>7.03            |
|                                                                                    | COOH | Cannabidiolic acid<br>(CBDA)                         | $C_{22}H_{30}O_4$<br>358.471<br>7.87            |
|   | H    | Cannabinol<br>(CBN)                                  | $C_{21}H_{26}O_2$<br>310.430<br>7.35            |
|                                                                                    | COOH | Cannabinolic acid<br>(CBNA)                          | $C_{22}H_{26}O_2$<br>354.439<br>8.08            |
|  | H    | Cannabigerol<br>(CBG)                                | $C_{21}H_{32}O_2$<br>316.478<br>7.47            |
|                                                                                    | COOH | Cannabigerolic acid<br>(CBGA)                        | $C_{22}H_{32}O_2$<br>360.487<br>8.31            |
|  | H    | Cannabichromene<br>(CBC)                             | $C_{21}H_{30}O_2$<br>314.462<br>8.56            |
|                                                                                    | COOH | Cannabichromenic acid<br>(CBCA)                      | $C_{22}H_{30}O_4$<br>358.471<br>9.29            |
|  | H    | Tetrahydrocannabivarin<br>(THCV)                     | $C_{19}H_{26}O_2$<br>286.409<br>6.62            |
|                                                                                    | COOH | Tetrahydrocannabivarinic<br>acid<br>(THCVA)          | $C_{20}H_{26}O_2$<br>330.418<br>7.34            |
|  | H    | Cannabidivarin<br>(CBDV)                             | $C_{19}H_{26}O_2$<br>286.409<br>5.97            |
|                                                                                    | COOH | Cannabidivarinic acid<br>(CBDVA)                     | $C_{20}H_{26}O_2$<br>330.418<br>6.81            |

The chemical structures were drawn in *Chemdraw* and all the shown information was extracted from *Chemspider*
